# Supplementary material for: A Western‐style dietary pattern is associated with cerebrospinal fluid biomarker levels for preclinical Alzheimer's disease—A population‐based cross‐sectional study among 70‐year‐olds
Source: PubMed Central journal article supplement — Alzheimers Dement (N Y). 2021 May 18;7(1):e12183. doi: 10.1002/trc2.12183 (PMC8129853; doi:10.1002/trc2.12183), 2021-05-18
Supplement: TRC2-7-e12183-s002.pdf [file TRC2-7-e12183-s002.pdf]

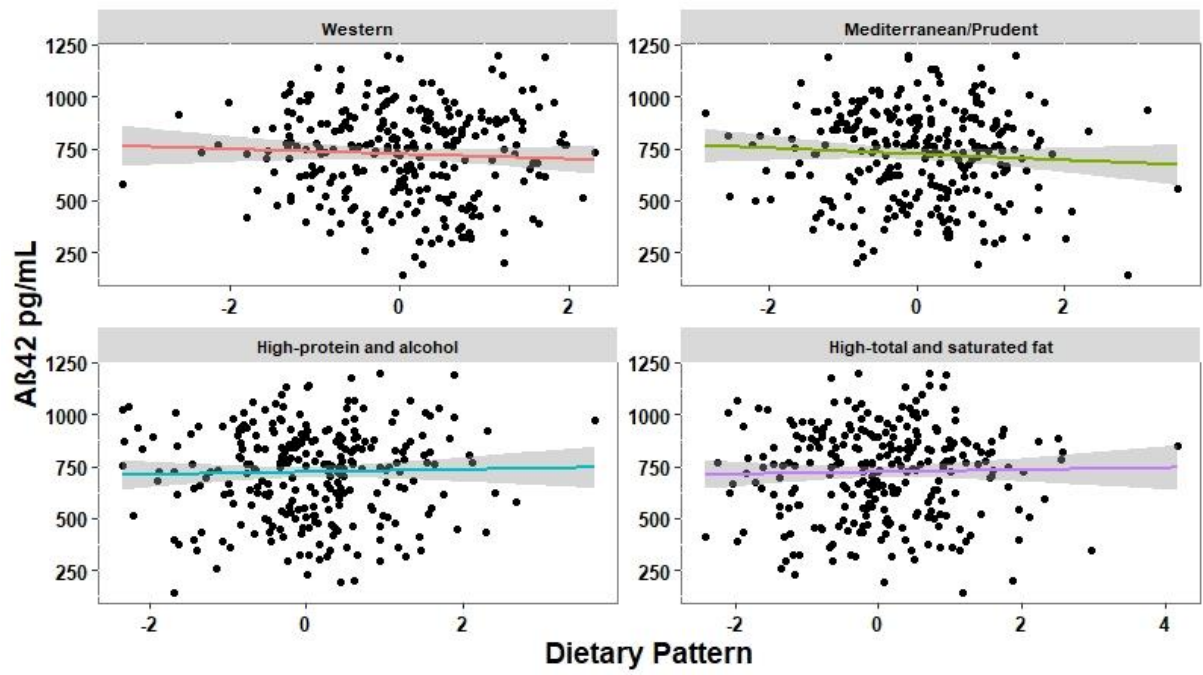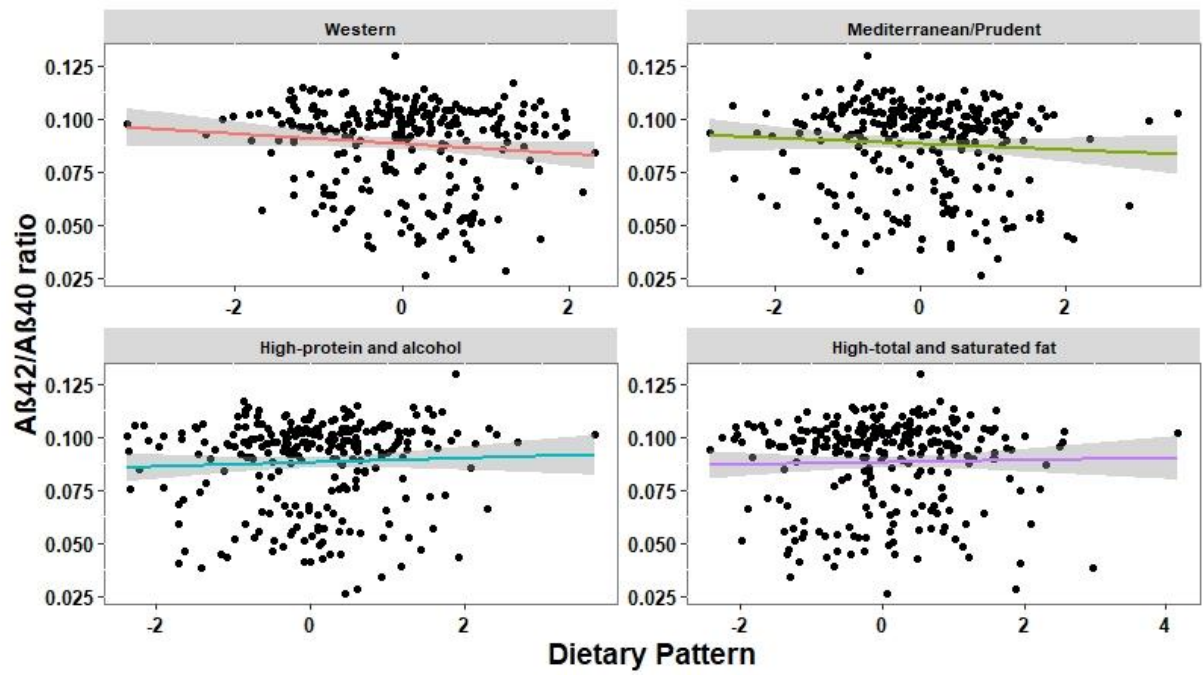

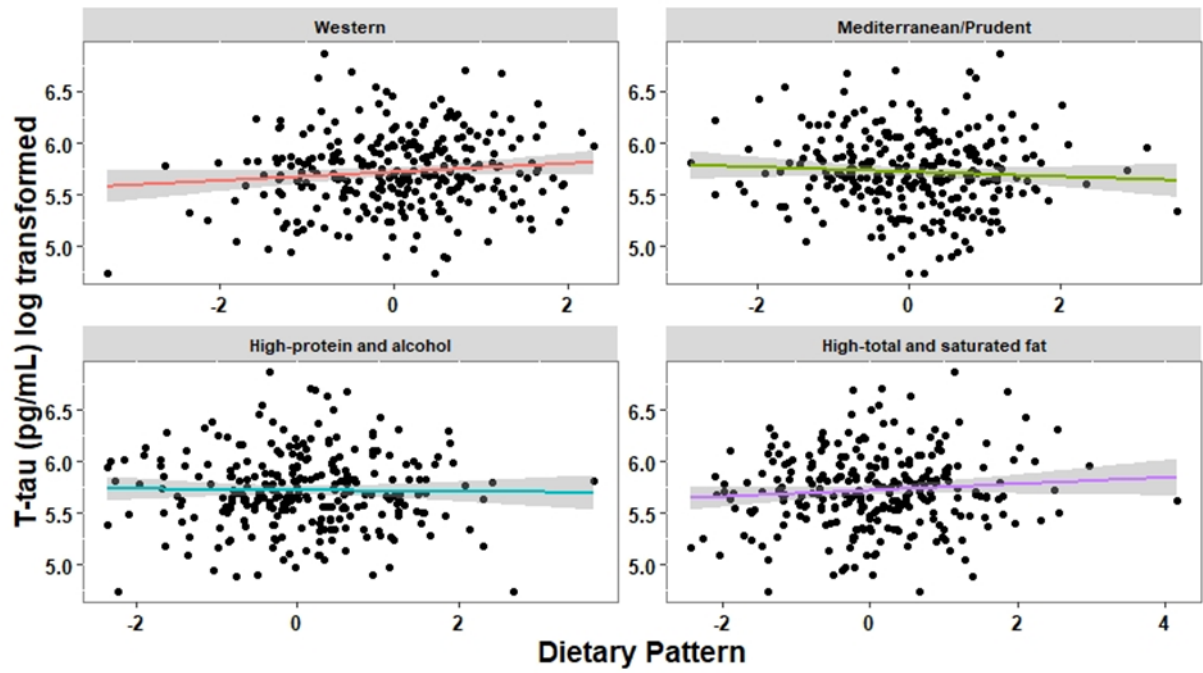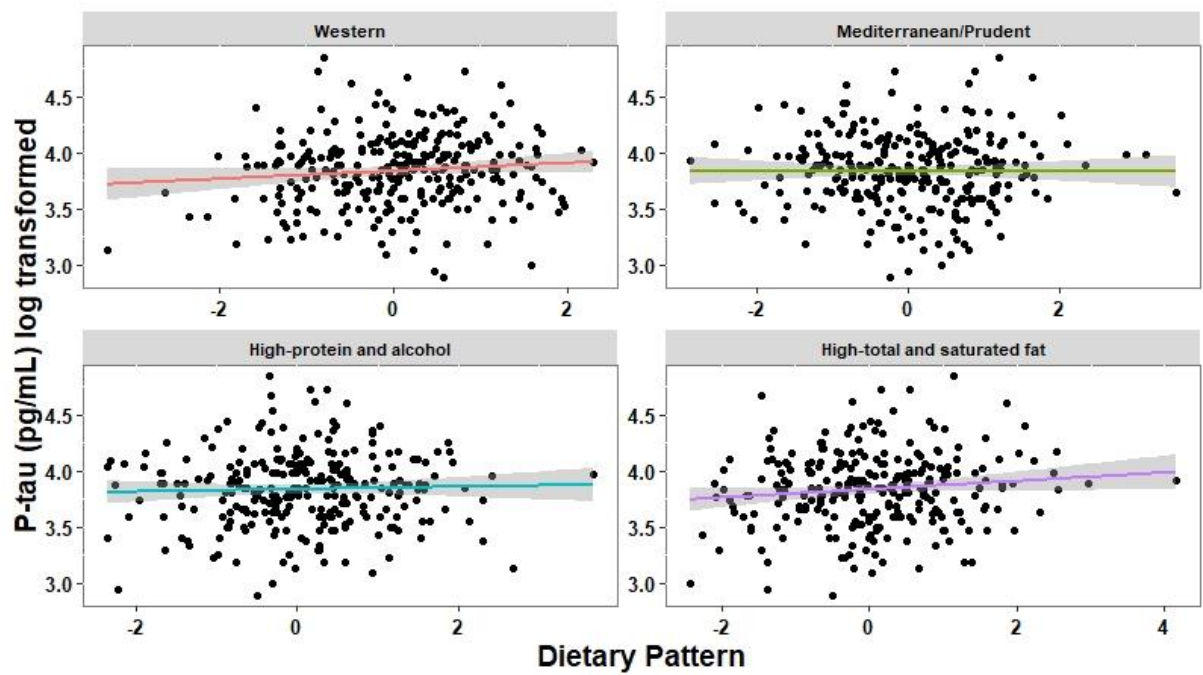

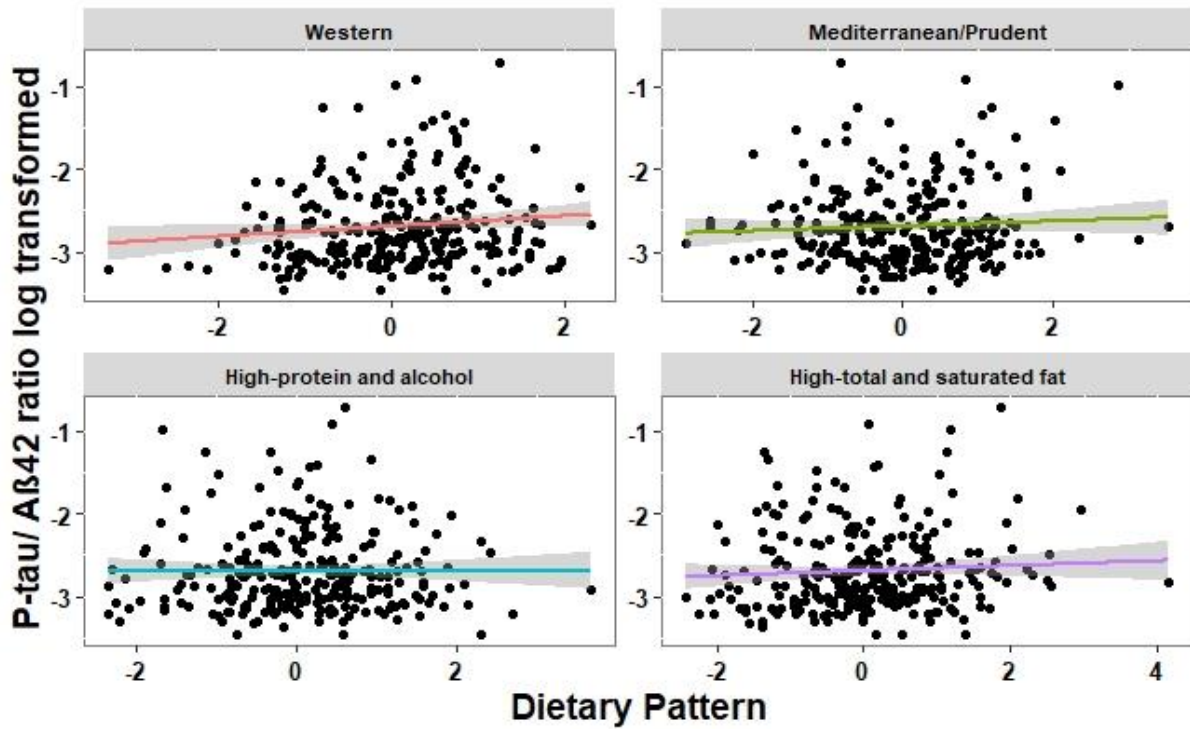

**Supplementary figure 2.** Scatter plots showing the relation between the four dietary patterns and CSF biomarker levels of A $\beta$ 42 and A $\beta$ 42/A $\beta$ 40 ratio, t-tau (log transformed), p-tau (log transformed) and the p-tau/A $\beta$ 42 ratio (log transformed).
