# Supplementary material for: A Western‐style dietary pattern is associated with cerebrospinal fluid biomarker levels for preclinical Alzheimer's disease—A population‐based cross‐sectional study among 70‐year‐olds
Source: PubMed Central journal article supplement — Alzheimers Dement (N Y). 2021 May 18;7(1):e12183. doi: 10.1002/trc2.12183 (PMC8129853; doi:10.1002/trc2.12183), 2021-05-18
Supplement: TRC2-7-e12183-s005.pdf [file TRC2-7-e12183-s005.pdf]

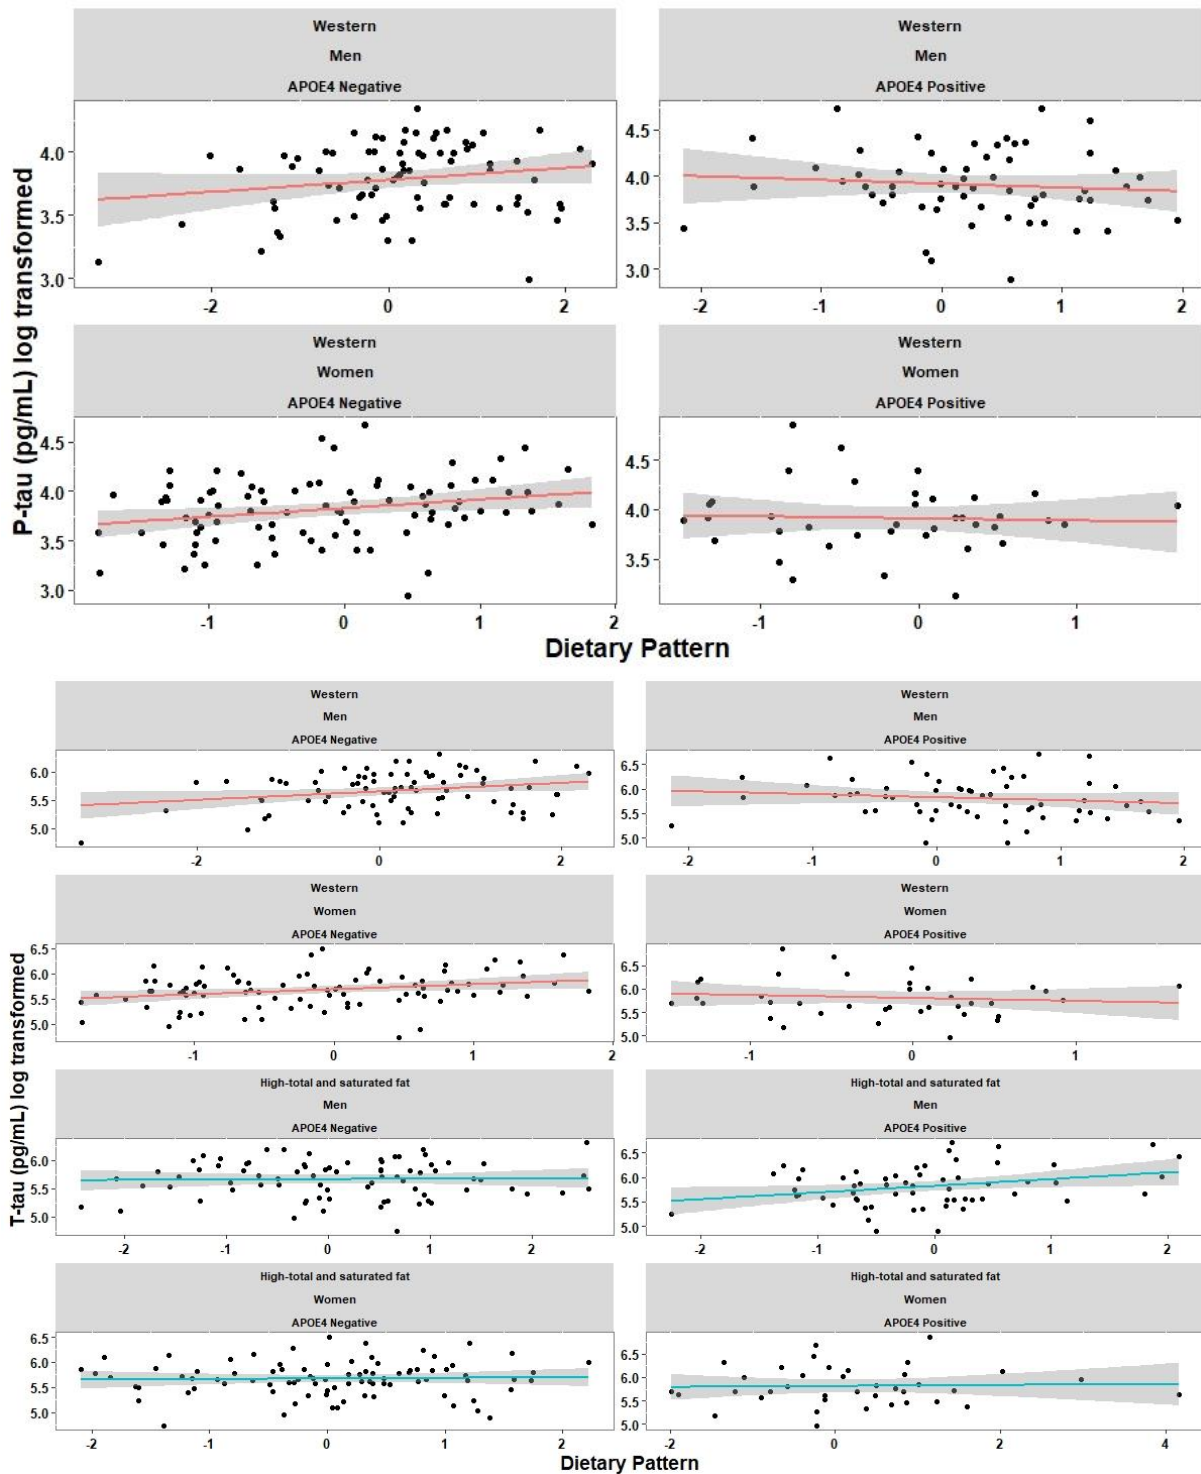

**Supplementary figure 3.** Scatter plots showing the relation between the dietary patterns and CSF biomarker levels stratified by sex and *APOE*  $\epsilon 4$  status. Scatter plots were made only in cases where an association (based on linear regression analysis) was found in any of the sub-groups. Associations were found between higher adherence to the western dietary pattern and higher t-tau levels (men and women), and higher p-tau (women only) levels, among *APOE*  $\epsilon 4$  non-carriers, and a higher adherence to the high-total and saturated fat pattern was associated with higher t-tau levels (men only) among *APOE*  $\epsilon 4$  carriers. In the adjusted models, the associations remained between higher adherence to the western dietary pattern and higher t-tau and p-tau levels among women that were *APOE*  $\epsilon 4$  non-carriers.
