# Supplementary figures and images for: A Western‐style dietary pattern is associated with cerebrospinal fluid biomarker levels for preclinical Alzheimer's disease—A population‐based cross‐sectional study among 70‐year‐olds
Source: PubMed Central journal article supplement — Alzheimers Dement (N Y). 2021 May 18;7(1):e12183. doi: 10.1002/trc2.12183 (PMC8129853; doi:10.1002/trc2.12183), 2021-05-18

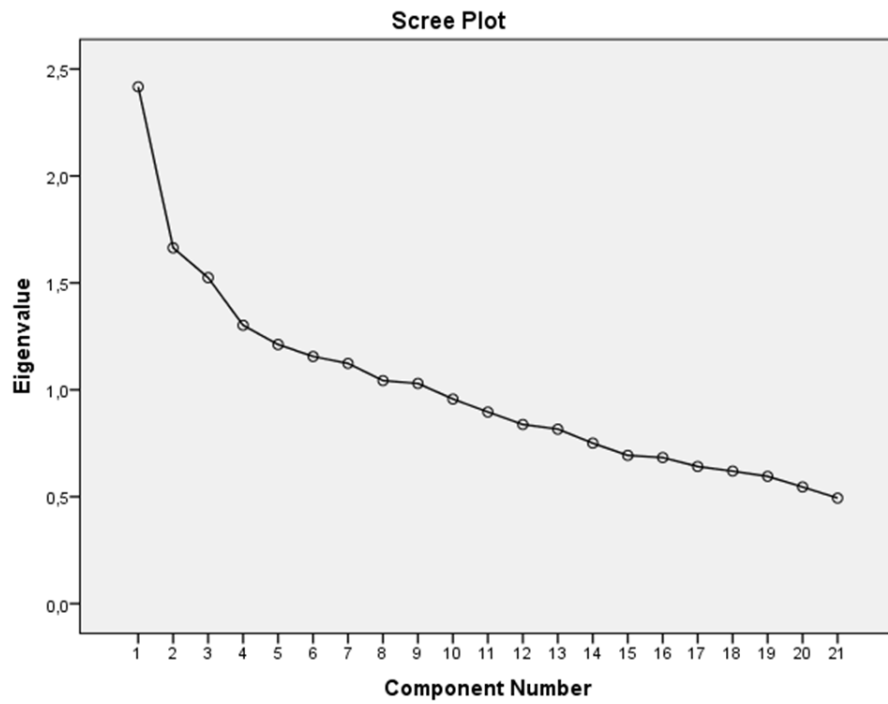

**Supplementary figure 1. Scree plot from Principal Component Analysis (n=861)**

Supplement: TRC2-7-e12183-s003.pdf [file TRC2-7-e12183-s003.pdf]
